# Supplementary material for: Genome-wide deletion mutant analysis reveals genes required for respiratory growth, mitochondrial genome maintenance and mitochondrial protein synthesis in Saccharomyces cerevisiae
Source: Springer Nature journal article supplement (doi:10.1186/gb-2009-10-9-r95), 2009-09-14
Supplement: Additional file 1 [file gb-2009-10-9-r95-s1.pdf]

**Supplemental table 1.** *pet* genes isolated from the *MAT $\alpha$*  deletion library. The list indicates systematic and standard names and a brief description of gene function according to the *Saccharomyces* Genome Database and manual annotation.

|           |                                                                                          |
|-----------|------------------------------------------------------------------------------------------|
| YAL009W   | SPO7, ER membrane protein of unknown function                                            |
| YAL010C   | MDM10, involved in mitochondrial morphology and inheritance                              |
| YAL013W   | DEP1, transcriptional modulator                                                          |
| YAL026C   | DRS2, maintains membrane lipid asymmetry in post-Golgi secretory vesicles                |
| YAL039C   | CYC3, holocytochrome c synthase (cytochrome c heme lyase)                                |
| YAL044C   | GCV3, glycine decarboxylase hydrogen carrier protein H subunit                           |
| YBL019W   | APN2, Class II abasic (AP) endonuclease; repair of DNA damage; homolog of hHAP1          |
| YBL021C   | HAP3, component of heterotrimeric CCAAT-binding factor                                   |
| YBL031W   | SHE1 Cytoskeletal protein of unknown function; overexpression causes growth arrest       |
| YBL032W   | HEK2, RNA binding protein; localizes ASH1 mRNA                                           |
| YBL036C   | non-specific single-domain racemase                                                      |
| YBL045C   | COR1, ubiquinol cytochrome c reductase core protein 1                                    |
| YBL046W   | PSY4, regulatory subunit of a protein phosphatase complex (nuclear)                      |
| YBL053W   | Dubious ORF, overlaps with SAS3n                                                         |
| YBL057C   | PTH2, negatively regulates the ubiquitin-proteasome pathway                              |
| YBL062W   | Dubious ORF, overlaps with SKT5                                                          |
| YBL080C   | PET112, Protein required for mitochondrial translation                                   |
| YBL082C   | ALG3, alpha(1-3) mannosyltransferase                                                     |
| YBL090W   | MRP21, mitochondrial ribosomal protein                                                   |
| YBL093C   | ROX3, RNA polymerase II holoenzyme component                                             |
| YBL099W   | ATP1, alpha subunit of F1-ATP synthase                                                   |
| YBL100C   | Dubious ORF, overlaps with ATP1                                                          |
| YBR003W   | COQ1, hexaprenyl pyrophosphate synthetase                                                |
| YBR026C   | ETR1, localized to in mitochondria, where it has a probable role in fatty acid synthesis |
| YBR039W   | ATP3, Gamma subunit of the F1 sector of mitochondrial F1F0 ATP synthase                  |
| YBR097W   | VPS15, serine/threonine protein kinase involved in vacuolar protein sorting              |
| YBR128C   | ATG14, Subunit of an autophagy-specific phosphatidylinositol 3-kinase complex            |
| YBR146W   | MRPS9, Mitochondrial ribosomal protein of the small subunit                              |
| YBR179C   | FZO1, transmembrane GTPase required for mitochondrial fusion                             |
| YBR251W   | MRPS5, mitochondrial ribosomal protein                                                   |
| YBR268W   | MRPL37, mitochondrial ribosomal protein                                                  |
| YBR282W   | MRPL27, mitochondrial ribosomal protein                                                  |
| YBR283C   | SSH1, involved in co-translational protein translocation in the ER                       |
| YBR289W   | SNF5, component of SWI-SNF global transcription activator complex                        |
| YCL001W-A | Unknown function                                                                         |
| YCL007C   | Dubious ORF; overlaps verified ORF YCL005W-A                                             |
| YCL010C   | SGF29, Probable 29kKDa Subunit of SAGA histone acetyltransferase complex                 |
| YCR003W   | MRPL32, mitochondrial ribosomal protein                                                  |
| YCR020W-B | HTL1, Subunit of the RSC chromatin remodeling complex                                    |
| YCR024C   | SLM5, Asparaginyl-tRNA synthetase, mitochondrial                                         |
| YCR028C-A | RIM1, binds single-stranded DNA, required for DNA replication in mitochondria            |
| YCR046C   | IMG1, Mitochondrial ribosomal protein of the large subunit                               |
| YCR071C   | IMG2, Mitochondrial ribosomal protein of the small subunit                               |
| YDL012C   | Plasma membrane protein of unknown function                                              |
| YDL033C   | SLM3, tRNA-specific 2-thiouridylase                                                      |
| YDL039C   | PRM7, Pheromone-regulated protein                                                        |
| YDL044C   | MTF2, mitochondrial protein involved in mRNA splicing and protein synthesis              |
| YDL045W-A | MRP10, mitochondrial ribosomal protein                                                   |
| YDL056W   | MBP1, transcription factor that collaborates with Swi6p                                  |
| YDL067C   | COX9, cytochrome c oxidase subunit VIIA                                                  |
| YDL068W   | Dubious ORF, overlaps with CBS1                                                          |
| YDL077C   | VAM6, Vacuolar protein, tethers steps of vacuolar membrane fusion                        |

|           |                                                                                         |
|-----------|-----------------------------------------------------------------------------------------|
| YDL091C   | UBX3, UBX domain-containing protein that interacts with Cdc48p                          |
| YDL099W   | BUG1, involved in ER to Golgi transport                                                 |
| YDL107W   | MSS2, required for export of C-terminal tail of Cox2p through the inner membrane        |
| YDL114W   | Putative protein of unknown function with similarity to acyl-carrier-protein reductases |
| YDL129W   | Unknown function                                                                        |
| YDL133W   | Unknown function                                                                        |
| YDL157C   | unknown function; detected in highly purified mitochondria in high-throughput studies   |
| YDL185W   | VMA1, catalytic subunit (subunit A) of the vacuolar H(+) ATPase V1 complex              |
| YDL192W   | ARF1, GTPase of the Ras superfamily involved in coated vesicles formation               |
| YDR010C   | Dubious ORF                                                                             |
| YDR025W   | RPS11A, Protein component of the small (40S) ribosomal subunit                          |
| YDR065W   | Unknown function                                                                        |
| YDR079W   | PET100, required for assembly of cytochrome c oxidase                                   |
| YDR114C   | Dubious ORF, overlaps with YDR115W                                                      |
| YDR115W   | Putative mitochondrial ribosomal protein                                                |
| YDR116C   | MRPL1, Mitochondrial ribosomal protein of the large subunit                             |
| YDR129C   | SAC6, actin filament bundling protein, fimbrin; essential for polarized secretion       |
| YDR148C   | KGD2, 2-oxoglutarate dehydrogenase complex E2 component                                 |
| YDR175C   | RSM24, mitochondrial ribosomal protein                                                  |
| YDR194C   | MSS116, mitochondrial RNA helicase, required for splicing of group II introns           |
| YDR197W   | CBS2, translational activator for cyt b                                                 |
| YDR204W   | COQ4, involved in biosynthesis of coenzyme Q                                            |
| YDR230W   | Dubious ORF, overlaps with COX20                                                        |
| YDR237W   | MRPL7, mitochondrial ribosomal protein                                                  |
| YDR269C   | Dubious ORF, overlaps with CCC2                                                         |
| YDR270W   | CCC2, copper-transporting P-type ATPase                                                 |
| YDR271C   | Dubious ORF, overlaps with CCC2                                                         |
| YDR296W   | MHR1, involved in repair, recombination and maintenance of mitochondrial DNA            |
| YDR298C   | ATP5, subunit 5 of F0-ATP synthase, oligomycin sensitivity-conferring subunit           |
| YDR337W   | MRPS28, mitochondrial ribosomal protein                                                 |
| YDR347W   | MRP1, mitochondrial ribosomal protein                                                   |
| YDR350C   | ATP22, required for assembly of the F0 sector of mitochondrial F1F0 ATP synthase        |
| YDR364C   | CDC40, pre-mRNA splicing factor                                                         |
| YDR375C   | BCS1, required for expression of functional Rieske iron-sulfur protein                  |
| YDR377W   | ATP17, ATP synthase subunit f                                                           |
| YDR448W   | ADA2, component of the histone acetyltransferase complexes                              |
| YDR458C   | HEH2, Protein of unknown function; GFP-fusion protein in nuclear periphery              |
| YDR491C   | Dubious ORF, overlaps with IZH1                                                         |
| YDR523C   | SPS1, Putative protein serine/threonine kinase                                          |
| YDR529C   | QCR7, ubiquinol cytochrome c reductase subunit 7                                        |
| YEL024W   | RIP1, ubiquinol cytochrome c reductase iron-sulfur protein                              |
| YEL027W   | CUP5, V-ATPase 16 kDa proteolipid subunit of membrane (V0) sector                       |
| YEL050C   | RML2, mitochondrial ribosomal protein L2 of the large subunit                           |
| YEL051W   | VMA8, vacuolar H(+)-ATPase (V-ATPase) subunit of the V1 catalytic sector                |
| YEL059C-A | SOM1, Subunit of the mitochondrial inner membrane peptidase                             |
| YER014C-A | BUD25, involved in bipolar budding                                                      |
| YER017C   | AFG3, involved in proteolytic and chaperone activities at the inner membrane            |
| YER050C   | RSM18, component of the mitochondrial ribosomal small subunit                           |
| YER061C   | CEM1, beta-ketoacyl-ACP synthase, mitochondrial                                         |
| YER070W   | RNR1, ribonucleosid-diphosphate-reductase, large (R1) subunit                           |
| YER087W   | similarity to tRNA synthetases; protein is detected in mitochondria                     |
| YER114C   | BOI2, Protein implicated in polar growth, functionally redundant with Boi1p             |
| YER131W   | RPS26B, Protein component of the small (40S) ribosomal subunit                          |
| YER145C   | FTR1, iron permease that mediates high-affinity iron uptake                             |
| YER154W   | OXA1, component of the mitochondrial protein export machinery                           |
| YER155C   | BEM2, Rho GTPase activating protein; control of cytoskeleton organization               |
| YFL016C   | MDJ1, DnaJ co-chaperone involved in mitochondrial biogenesis and protein folding        |
| YGL017W   | ATE1, Arginyl-tRNA-protein transferase                                                  |
| YGL070C   | RPB9, RNA polymerase II, non-essential subunit, not shared                              |

|           |                                                                                        |
|-----------|----------------------------------------------------------------------------------------|
| YGL071W   | RCS1, transcription factor regulates genes involved in iron uptake and cell size       |
| YGL129C   | RSM23, mitochondrial ribosomal protein                                                 |
| YGL135W   | RPL1B, large subunit ribosomal protein L1                                              |
| YGL143C   | MRF1, mitochondrial peptide chain release factor                                       |
| YGL165C   | Dubious ORF, overlaps with CUP2                                                        |
| YGL206C   | CHC1, clathrin heavy chain                                                             |
| YGL218W   | Dubious ORF, overlaps with MDM34                                                       |
| YGL237C   | HAP2, component of heterotrimeric CCAAT-binding factor                                 |
| YGL240W   | DOC1, anaphase promoting complex (APC10)                                               |
| YGL244W   | RTF1, pol II transcription elongation factor, regulates DNA binding properties of TBP  |
| YGL251C   | HFM1, Meiosis specific DNA helicase                                                    |
| YGR020C   | VMA7, vacuolar H(+)-ATPase 14 kDa subunit of the catalytic (V0) sector                 |
| YGR062C   | COX18, required for activity of mitochondrial cytochrome oxidase                       |
| YGR076C   | MRPL25, mitochondrial ribosomal protein                                                |
| YGR102C   | Unknown function, located in mitochondria                                              |
| YGR105W   | VMA21, required for vacuolar H(+)-ATPase (V-ATPase) assembly                           |
| YGR112W   | SHY1, mitochondrial protein required for assembly of cytochrome c oxidase complex      |
| YGR150C   | Unknown function, located in mitochondria                                              |
| YGR155W   | CYS4, cystathionine beta-synthase                                                      |
| YGR167W   | CLC1, clathrin light chain                                                             |
| YGR171C   | MSM1, Met-tRNA synthetase, mitochondrial                                               |
| YGR180C   | RNR4, component of ribonucleotide reductase small subunit                              |
| YGR215W   | RSM27, mitochondrial ribosomal protein                                                 |
| YGR220C   | MRPL9, mitochondrial ribosomal protein                                                 |
| YGR222W   | PET54, specific translational activator for COX3                                       |
| YGR243W   | FMP43, protein was localized to mitochondria                                           |
| YGR262C   | BUD32, may be involved in polar bud-site selection                                     |
| YHL038C   | CBP2, required for splicing of the COB a15 intron and 21S mitochondrial rRNA intron    |
| YHR006W   | STP2, Transcription factor; activates transcription of amino acid permease genes       |
| YHR009C   | Unknown function                                                                       |
| YHR011W   | DIA4, tRNA synthetase, may be involved in mitochondrial function                       |
| YHR026W   | PPA1, proteolipid of the vacuolar H(+)-ATPase                                          |
| YHR038W   | RRF1, Mitochondrial ribosome recycling factor, essential for respiratory function      |
| YHR039C   | MSC7, Protein of unknown function, GFP-fusion protein in endoplasmic reticulum         |
| YHR039C-B | VMA10, vacuolar H(+)-ATPase (V-ATPase) 13 kDa subunit                                  |
| YHR049C-A | Dubious ORF                                                                            |
| YHR051W   | COX6, cytochrome c oxidase subunit VI                                                  |
| YHR060W   | VMA22, protein involved in vacuolar H(+)-ATPase assembly or function                   |
| YHR067W   | HTD2, involved in mitochondrial fatty acid biosynthesis                                |
| YHR091C   | MSR1, arginyl-tRNA synthetase of mitochondria                                          |
| YHR120W   | MSH1, involved in mitochondrial DNA repair                                             |
| YHR147C   | MRPL6, mitochondrial ribosomal protein                                                 |
| YHR168W   | MTG2, mitochondrial GTPase, possibly involved in ribosome assembly                     |
| YIL125W   | KGD1, alpha-Ketoglutarate dehydrogenase                                                |
| YIL157C   | COA1, required for assembly of the cytochrome c oxidase complex                        |
| YIR021W   | MRS1, protein involved in mitochondrial RNA splicing of COB mRNA                       |
| YJL003W   | COX16, required for assembly of cytochrome c oxidase                                   |
| YJL046W   | Similarity to lipoate-protein ligase A                                                 |
| YJL062W-A | Putative protein of unknown function, GFP-fusion protein localizes to the mitochondria |
| YJL063C   | MRPL8, mitochondrial ribosomal protein of the large subunit                            |
| YJL096W   | MRPL49, mitochondrial ribosomal protein of the large subunit                           |
| YJL102W   | MEF2, mitochondrial translation elongation factor                                      |
| YJL120W   | Dubious ORF, overlaps with RPE1                                                        |
| YJL121C   | RPE1, ribulose-5-phosphate 3-epimerase                                                 |
| YJL124C   | LSM1, involved in degradation of cytoplasmic mRNAs                                     |
| YJL176C   | SWI3, component of SWI-SNF global transcription activator complex                      |
| YJL180C   | ATP12, F1-ATP synthase assembly protein                                                |
| YJL184W   | GON7, unknown function                                                                 |
| YJL209W   | CBP1, required for COB mRNA stability or 5' processing                                 |

|           |                                                                                      |
|-----------|--------------------------------------------------------------------------------------|
| YJR040W   | GEF1, voltage-gated chloride channel                                                 |
| YJR077C   | MIR1, phosphate transporter of the mitochondrial carrier (MCF) family                |
| YJR113C   | RSM7, Mitochondrial ribosomal protein of the small subunit                           |
| YJR121W   | ATP2, beta subunit of F1-ATP synthase                                                |
| YJR122W   | CAF17, component of the CCR4 transcription complex                                   |
| YJR144W   | MGM101, mitochondrial genome maintenance protein                                     |
| YKL003C   | MRP17, mitochondrial ribosomal protein                                               |
| YKL016C   | ATP7, ATP synthase subunit d                                                         |
| YKL040C   | NFU1, homeostasis of metal ions, Nifu-like protein (NUB1)                            |
| YKL055C   | OAR1, mitochondrial type II fatty acid synthase                                      |
| YKL080W   | VMA5, vacuolar H(+)-ATPase (V-ATPase) hydrophilic subunit (subunit C)                |
| YKL109W   | HAP4, component of heterotrimeric CCAAT-binding factor                               |
| YKL114C   | APN1, Major apurinic/aprimidinic endonuclease, repair of DNA damage                  |
| YKL119C   | VPH2, vacuolar H(+)-ATPase (V-ATPase) assembly protein acting in the ER              |
| YKL134C   | OCT1, mitochondrial intermediate peptidase                                           |
| YKL138C   | MRPL31, mitochondrial ribosomal protein                                              |
| YKL155C   | RSM22, mitochondrial ribosomal protein                                               |
| YKL169C   | Dubious ORF, overlaps with MRPL38                                                    |
| YKL170W   | MRPL38, mitochondrial ribosomal protein                                              |
| YKL194C   | MST1, mitochondrial threonyl tRNA synthase                                           |
| YKR006C   | MRPL13, mitochondrial ribosomal protein                                              |
| YKR085C   | MRPL20, mitochondrial ribosomal protein                                              |
| YLL018C-A | COX19, required for cytochrome c oxidase assembly                                    |
| YLL027W   | ISA1, mitochondrial protein required for normal iron metabolism                      |
| YLL033W   | Unknown function                                                                     |
| YLL041C   | SDH2, iron-sulfur protein subunit of succinat dehydrogenase                          |
| YLL042C   | ATG10, E2-like conjugating enzyme, involved in autophagy                             |
| YLR038C   | COX12, cytochrome-c oxidase, subunit VIb                                             |
| YLR056W   | ERG3, C-5 sterol desaturase (microsomal membrane)                                    |
| YLR067C   | PET309, required for stability and translation of COX1 mRNA                          |
| YLR069C   | MEF1, mitochondrial translation elongation factor G                                  |
| YLR070C   | XYL2, Xylitol dehydrogenase, converts xylitol to D-xylulose                          |
| YLR091W   | Unknown function, located in mitochondria                                            |
| YLR125W   | Unknown function                                                                     |
| YLR139C   | SLS1, protein involved in mitochondrial metabolism                                   |
| YLR144C   | ACF2, beta-1,3-endoglucanase; probable role in cortical actin cytoskeleton assembly  |
| YLR201C   | COQ9, Mitochondrial inner membrane protein required for ubiquinone biosynthesis      |
| YLR202C   | Dubious ORF, overlaps with YLR201C and MSS51                                         |
| YLR203C   | MSS51, mitochondrial protein required for respiratory growth and translation of COX1 |
| YLR260W   | LCB5, long chain base kinase, involved in sphingolipid metabolism                    |
| YLR270W   | DCS1, Non-essential hydrolase involved in mRNA decapping                             |
| YLR294C   | Dubious ORF, overlaps with ATP14                                                     |
| YLR295C   | ATP14, ATP synthase subunit h                                                        |
| YLR304C   | ACO1, aconitase                                                                      |
| YLR312W-A | MRPL15, mitochondrial ribosomal protein                                              |
| YLR337C   | VRP1, involved in cytoskeletal organization and cytokinesis                          |
| YLR369W   | SSQ1, mitochondrial Hsp70 involved in biogenesis of iron-sulfur proteins             |
| YLR382C   | NAM2, leucyl-tRNA synthetase, mitochondrial,                                         |
| YLR439W   | MRPL4, mitochondrial ribosomal protein of the large subunit                          |
| YLR447C   | VMA6, vacuolar H(+)-ATPase (V-ATPase) 36 kDa subunit                                 |
| YML061C   | PIF1, single-stranded DNA-dependent ATPase and 5'-3' DNA helicase                    |
| YML087C   | Unknown function                                                                     |
| YML110C   | COQ5, involved in ubiquinone biosynthesis                                            |
| YML120C   | NDI1, NADH:ubiquinone oxidoreductase                                                 |
| YMR015C   | ERG5, C-22 sterol desaturase                                                         |
| YMR021C   | MAC1, Copper-sensing transcription factor                                            |
| YMR035W   | IMP2, catalytic subunit of the mitochondrial inner membrane protease Imp             |
| YMR064W   | AEP1, required for accumulation of transcript of ATP9/OLI1                           |
| YMR070W   | MOT3, Nuclear transcription factor; e.g. repression of ergosterol biosynthetic genes |

|         |                                                                                  |
|---------|----------------------------------------------------------------------------------|
| YMR072W | ABF2, DNA-binding protein required for maintenance of mitochondrial genome       |
| YMR077C | VPS20, Myristoylated subunit of the endosomal sorting complex                    |
| YMR089C | YTA12, involved in proteolytic and chaperone activities in the inner membrane    |
| YMR097C | MTG1, likely functions in assembly of the large ribosomal subunit                |
| YMR098C | ATP25, required for stability of ATP9 mRNA                                       |
| YMR150C | IMP1, catalytic subunit of the mitochondrial inner membrane protease Imp         |
| YMR151W | YIM2, Dubious ORF, overlaps with IMP1                                            |
| YMR158W | MRPS8, Mitochondrial ribosomal protein of the small subunit                      |
| YMR188C | MRPS17, Mitochondrial ribosomal protein of the small subunit                     |
| YMR193W | MRPL24, mitochondrial ribosomal protein of the large subunit                     |
| YMR228W | MTF1, mitochondrial RNA polymerase specificity factor                            |
| YMR256C | COX7, cytochrome c oxidase, subunit VII                                          |
| YMR257C | PET111, required for mitochondrial translation of COX2 mRNA                      |
| YMR267W | PPA2, inorganic pyrophosphatase, mitochondrial                                   |
| YMR282C | AEP2, required for the expression of Atp9p                                       |
| YMR286W | MRPL33, mitochondrial ribosomal protein of the large subunit                     |
| YMR287C | DSS1, RNase, associates with the ribosome, turnover of aberrant RNAs             |
| YMR293C | May be involved in mitochondrial function                                        |
| YNL005C | MRP7, mitochondrial ribosomal protein                                            |
| YNL052W | COX5A, cytochrome c oxidase subunit Va                                           |
| YNL073W | MSK1, lysyl-tRNA synthetase, mitochondrial                                       |
| YNL081C | Putative mitochondrial ribosomal protein of the small subunit                    |
| YNL138W | SRV2, adenylate cyclase-associated protein                                       |
| YNL159C | ASI2, Integral inner nuclear membrane protein                                    |
| YNL170W | Dubious ORF, overlaps with PSD1                                                  |
| YNL177C | MRPL22, Mitochondrial ribosomal protein of the large subunit                     |
| YNL184C | Dubious ORF, overlaps with MRPL19                                                |
| YNL185C | MRPL19, Mitochondrial ribosomal protein of the large subunit                     |
| YNL213C | Unknown function, located in mitochondria                                        |
| YNL252C | MRPL17, mitochondrial ribosomal protein                                          |
| YNL315C | ATP11, F1-ATP synthase assembly protein                                          |
| YNR020C | ATP23, metalloprotease required for processing of Atp6                           |
| YNR037C | RSM19, Mitochondrial ribosomal protein of the small subunit                      |
| YNR041C | COQ2, para-hydroxybenzoate-polyprenyltransferase                                 |
| YNR042W | Dubious ORF, overlaps with COQ2                                                  |
| YNR045W | PET494, translational activator required for mitochondrial translation of COX3   |
| YOL008W | COQ10, Coenzyme Q binding protein                                                |
| YOL009C | MDM12, mitochondrial morphology and inheritance protein                          |
| YOL033W | MSE1, glutamyl-tRNA synthetase, mitochondrial                                    |
| YOL051W | GAL11, Component of RNA polymerase II holoenzyme                                 |
| YOL071W | EMI5, non-essential protein of unknown function                                  |
| YOL083W | Unknown function                                                                 |
| YOL095C | HMI1, mitochondrial DNA helicase involved in maintenance of mtDNA                |
| YOL096C | COQ3, catalyzes two different O-methylation steps in ubiquinone biosynthesis     |
| YOR036W | PEP12, syntaxin homolog (t-SNARE) involved in Golgi to vacuole transport         |
| YOR065W | CYT1, cytochrome c1                                                              |
| YOR127W | RGA1, GTPase-activating protein for Cdc42p                                       |
| YOR150W | MRPL23, Mitochondrial ribosomal protein                                          |
| YOR155C | ISN1, Inosine 5'-monophosphate (IMP)-specific 5'-nucleotidase, breakdown of IMP  |
| YOR158W | PET123, mitochondrial ribosomal protein                                          |
| YOR187W | TUF1, translation elongation factor Tu, mitochondrial                            |
| YOR200W | Dubious ORF, overlaps with PET56                                                 |
| YOR211C | MGM1, peripheral membrane protein required for mitochondrial morphology          |
| YOR221C | MCT1, mitochondrial type II fatty acid synthase                                  |
| YOR241W | MET7, required for methionine synthesis and for maintenance of mitochondrial DNA |
| YOR305W | Unknown function, probably mitochondrial                                         |
| YOR318C | Dubious ORF unlikely to encode a protein                                         |
| YOR330C | MIP1, mitochondrial DNA-directed DNA polymerase                                  |
| YOR331C | Dubious ORF, overlaps with VMA4                                                  |

|           |                                                                                       |
|-----------|---------------------------------------------------------------------------------------|
| YOR332W   | VMA4, vacuolar H(+)-ATPase hydrophilic subunit (subunit E)                            |
| YOR350C   | MNE1, similar to <i>Lucilia illustris</i> mitochondrial cytochrome oxidase            |
| YOR358W   | HAP5, component of heterotrimeric CCAAT-binding factor                                |
| YOR375C   | GDH1, NADP(+)-dependent glutamate dehydrogenase                                       |
| YOR380W   | RDR1, Transcriptional repressor, control of multidrug resistance                      |
| YPL013C   | MRPS16, Mitochondrial ribosomal protein of the small subunit                          |
| YPL031C   | PHO85, cyclin-dependent kinase                                                        |
| YPL045W   | VPS16, vacuolar sorting protein                                                       |
| YPL059W   | GRX5, mitochondrial protein involved in the synthesis/assembly of iron-sulfur centers |
| YPL078C   | ATP4, subunit 4 of F <sub>0</sub> -ATP synthase                                       |
| YPL097W   | MSY1, tyrosyl-tRNA synthetase, mitochondrial                                          |
| YPL104W   | MSD1, aspartyl-tRNA synthetase, mitochondrial                                         |
| YPL132W   | COX11, required for heme A synthesis                                                  |
| YPL136W   | Dubious ORF, overlaps with GIP3                                                       |
| YPL148C   | PPT2, activates mitochondrial acyl carrier protein                                    |
| YPL172C   | COX10, farnesyl transferase required for heme A synthesis                             |
| YPL173W   | MRPL40, mitochondrial ribosomal protein of the large subunit                          |
| YPL188W   | POS5, mitochondrial NADH kinase; required for the response to oxidative stress        |
| YPL189C-A | COA2, Cytochrome oxidase assembly factor                                              |
| YPL215W   | CBP3, required for assembly of cytochrome bc <sub>1</sub> complex                     |
| YPL234C   | VMA11, proteolipid component of V-ATPase                                              |
| YPL254W   | HFI1, component of the ADA complex                                                    |
| YPL262W   | FUM1, fumarate hydratase                                                              |
| YPL271W   | ATP15, epsilon subunit of F <sub>1</sub> -ATP synthase                                |
| YPR036W   | VMA13, vacuolar H(+)-ATPase (V-ATPase) 54 kDa subunit of V1 sector)                   |
| YPR066W   | UBA3, Rub1-activating enzyme, similar to ubiquitin-activating E1 protein              |
| YPR067W   | ISA2, mitochondrial protein required for iron metabolism                              |
| YPR099C   | Dubious ORF, overlaps with MRPL51                                                     |
| YPR116W   | Unknown function                                                                      |
| YPR123C   | Dubious ORF, overlaps with CTR1                                                       |
| YPR191W   | QCR2, ubiquinol cytochrome c reductase core protein 2                                 |
